# Supplementary material
Source: PubMed Central journal article supplement (PMC4990136)
Supplement: NIHMS68948-supplement-Supplementary_figure_1.pdf [file NIHMS68948-supplement-Supplementary_figure_1.pdf]

# Supplementary Figure 1

## Figure 1

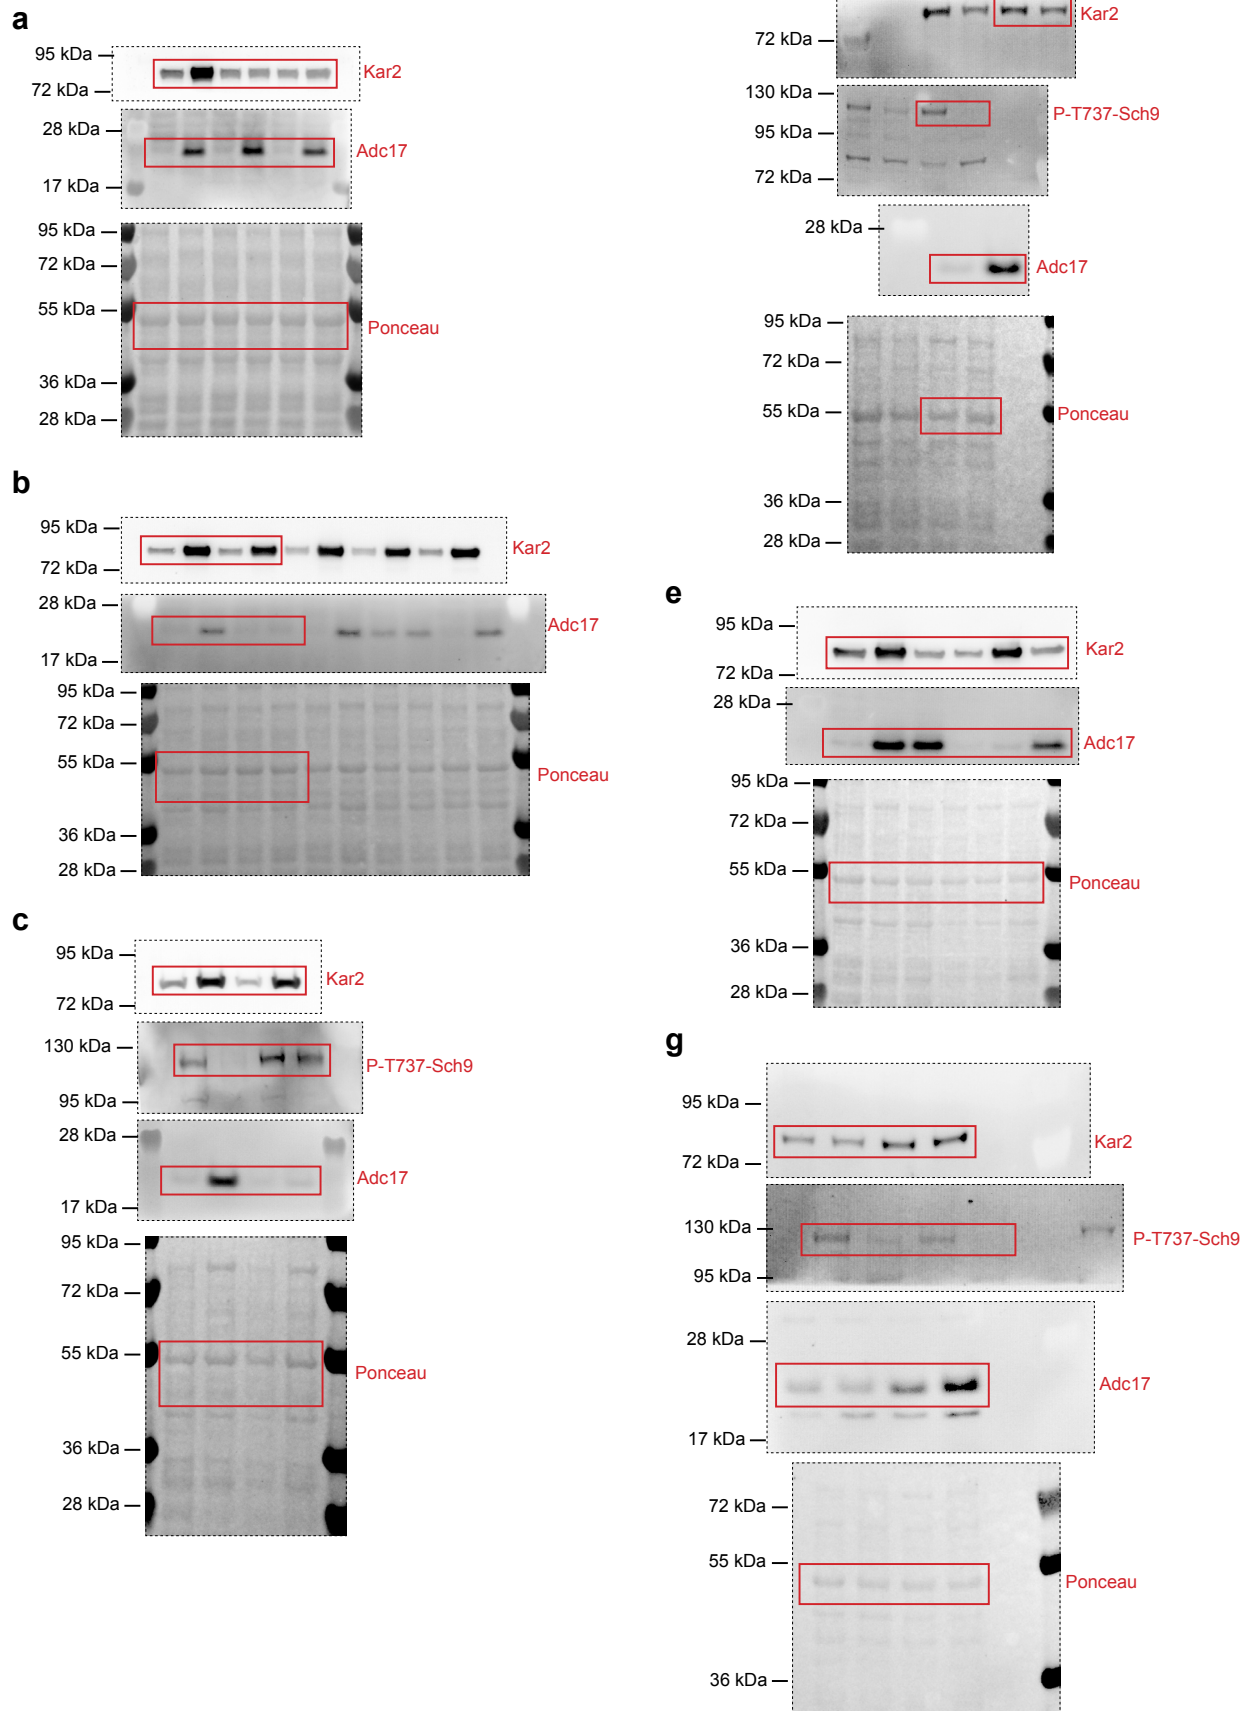

After protein transfer membranes were cut and their fragments were incubated with antibodies against indicated proteins.

**Figure 1****h**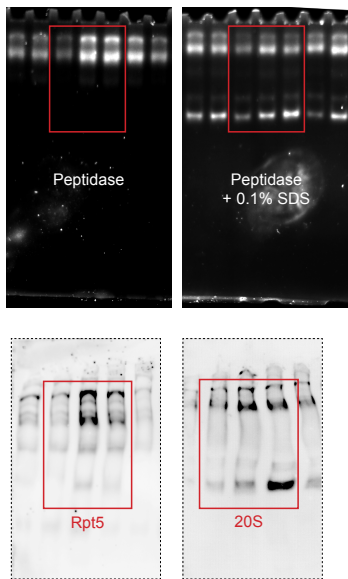**Figure 2****g**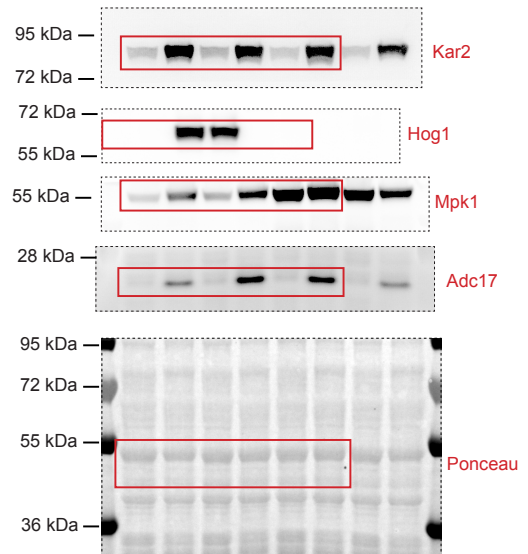**Figure 2****c**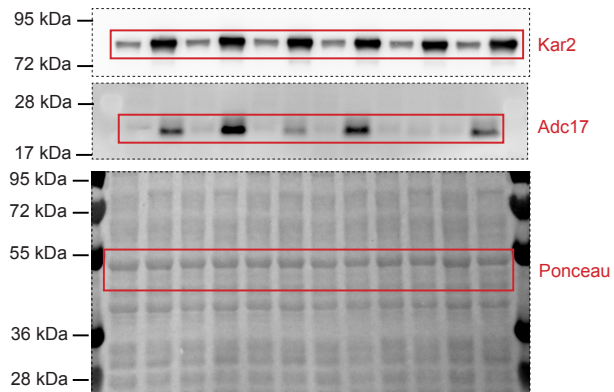**e**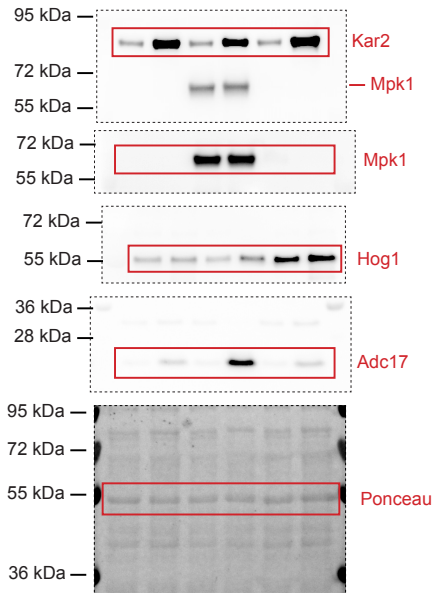**Figure 3****a**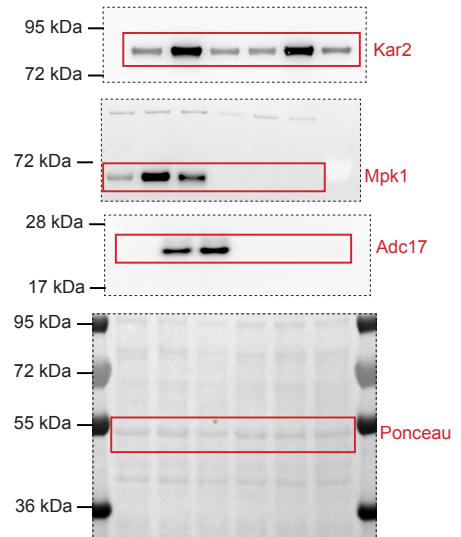**b**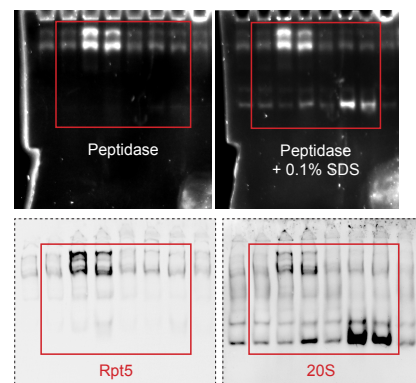

After protein transfer membranes were cut and their fragments were incubated with antibodies against indicated proteins.

**Figure 3**

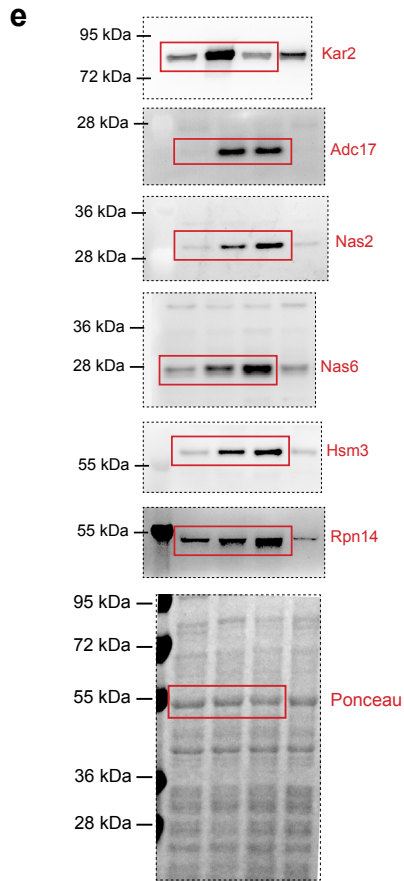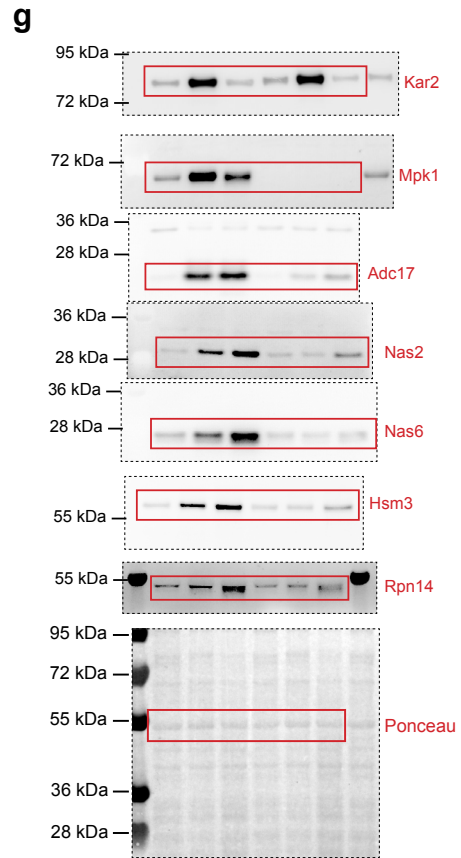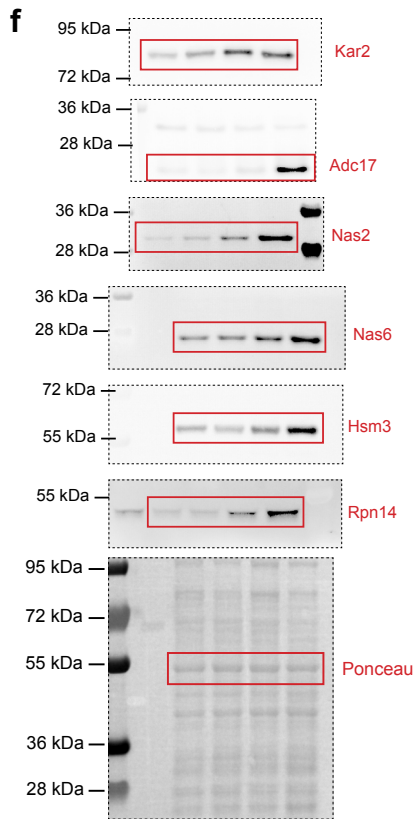

**Figure 5**

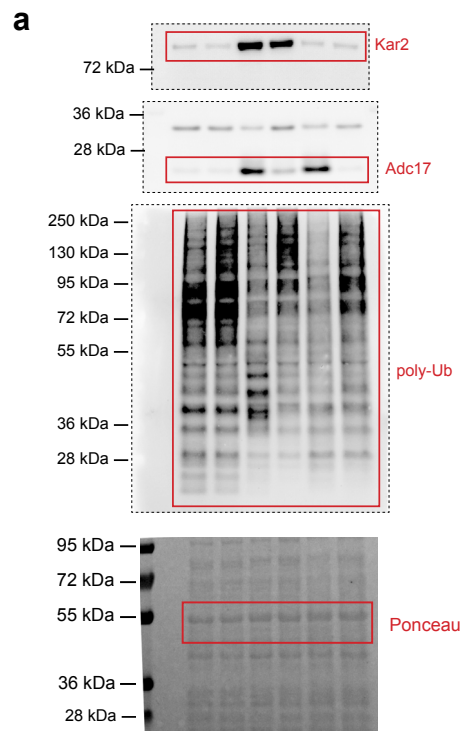

After protein transfer membranes were cut and their fragments were incubated with antibodies against indicated proteins.

**Figure 5**

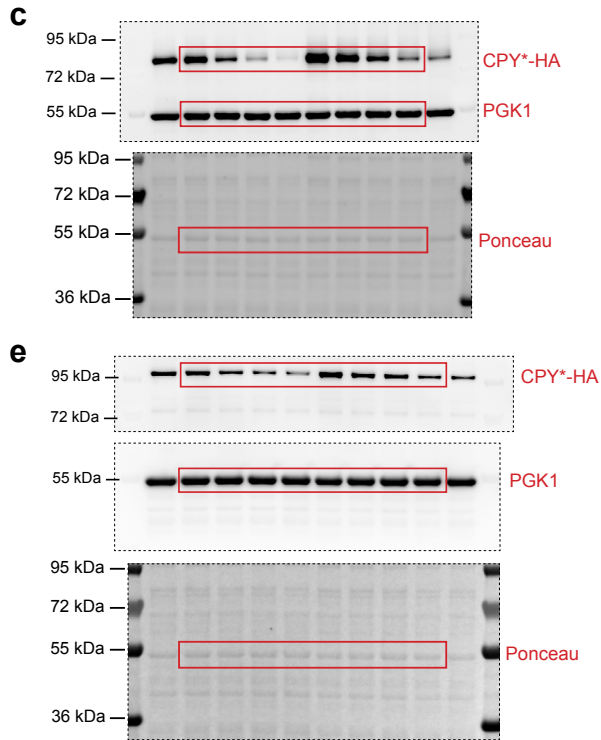

**Figure 6**

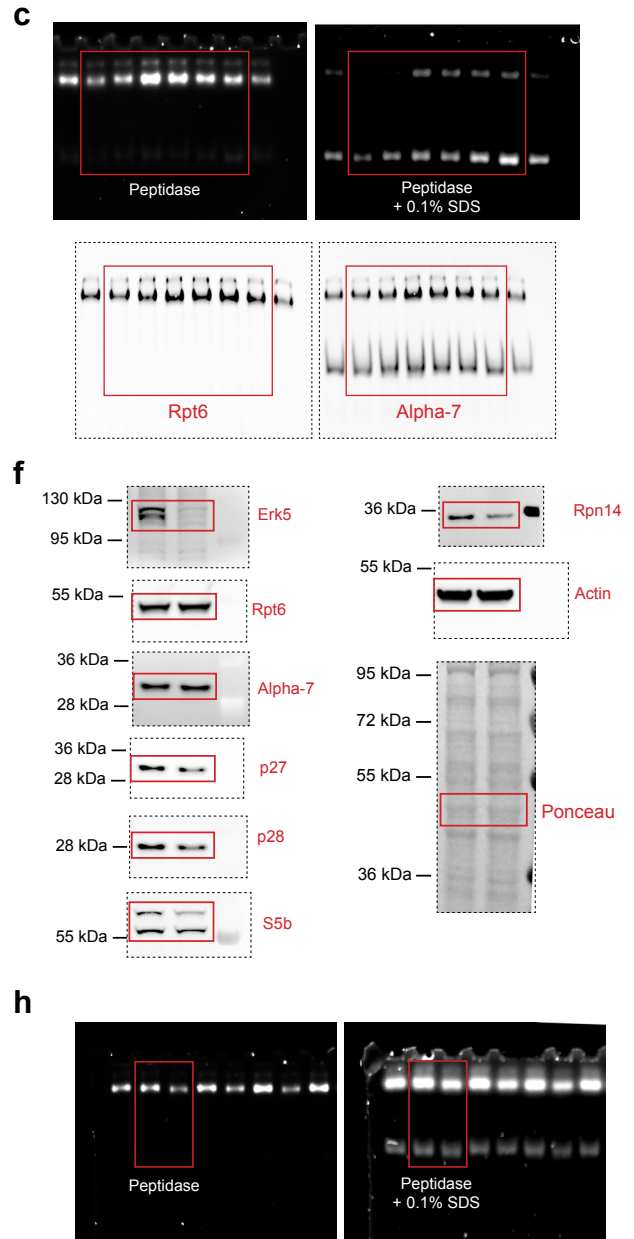

**Figure 6**

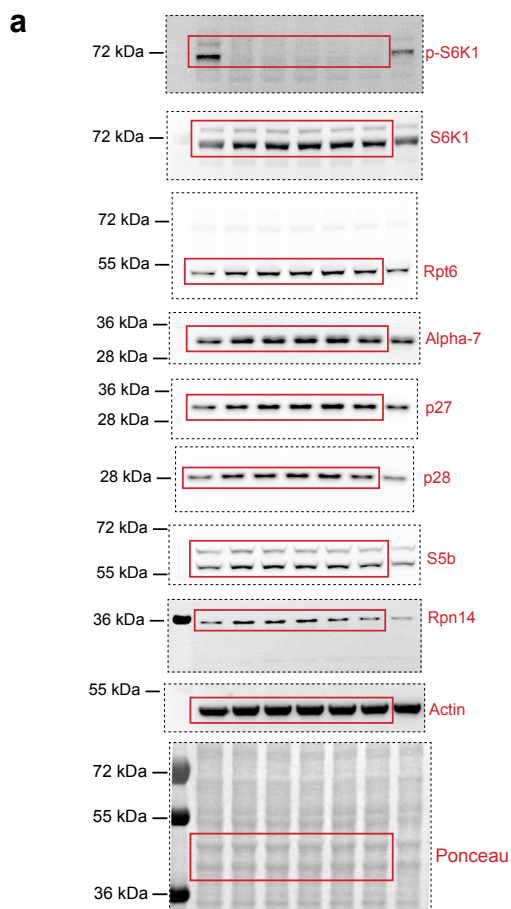

**Extended Data Figure 1**

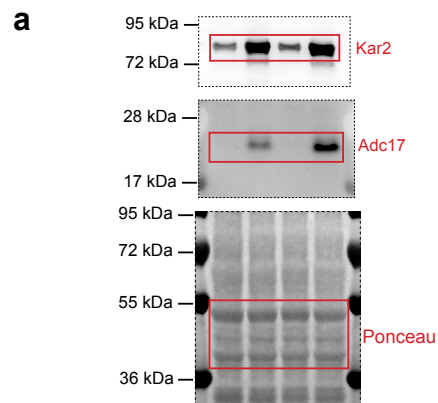

After protein transfer membranes were cut and their fragments were incubated with antibodies against indicated proteins.

### Extended Data Figure 2

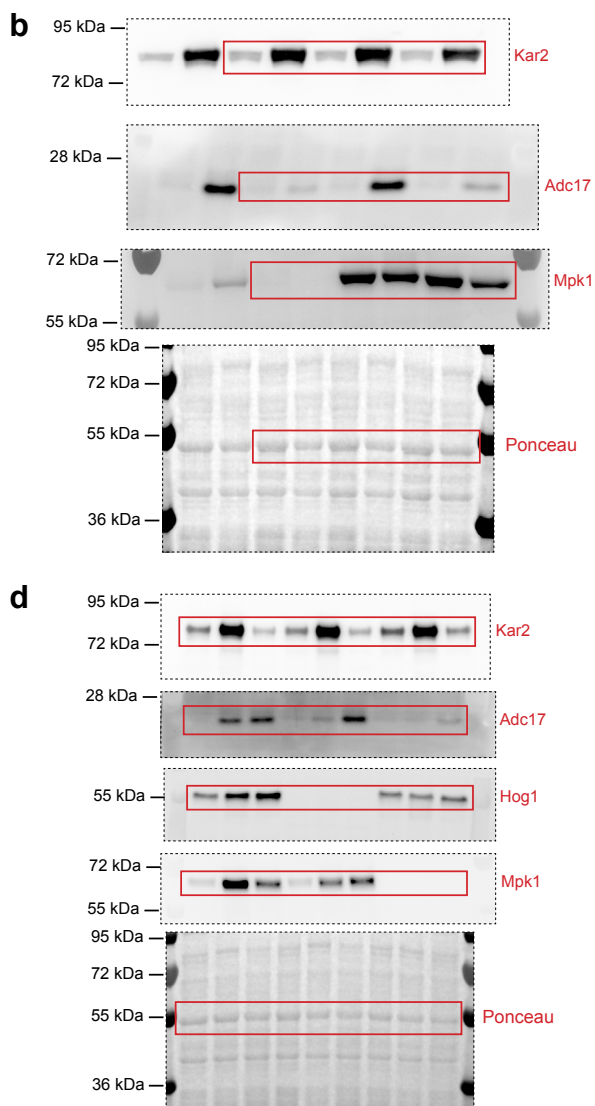

### Extended Data Figure 3

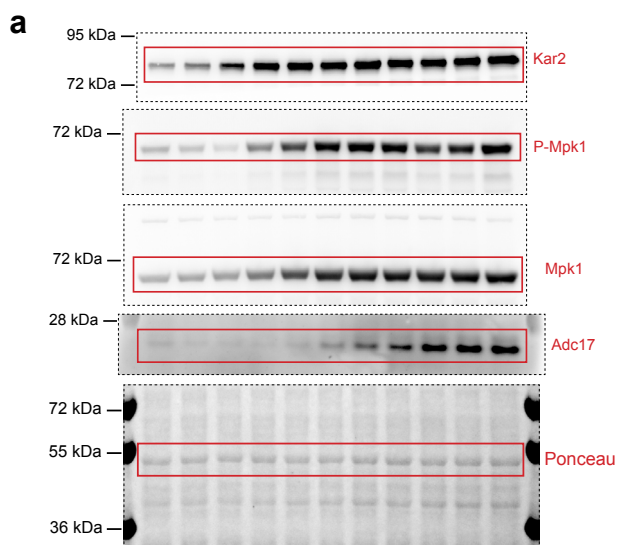

### Extended Data Figure 3

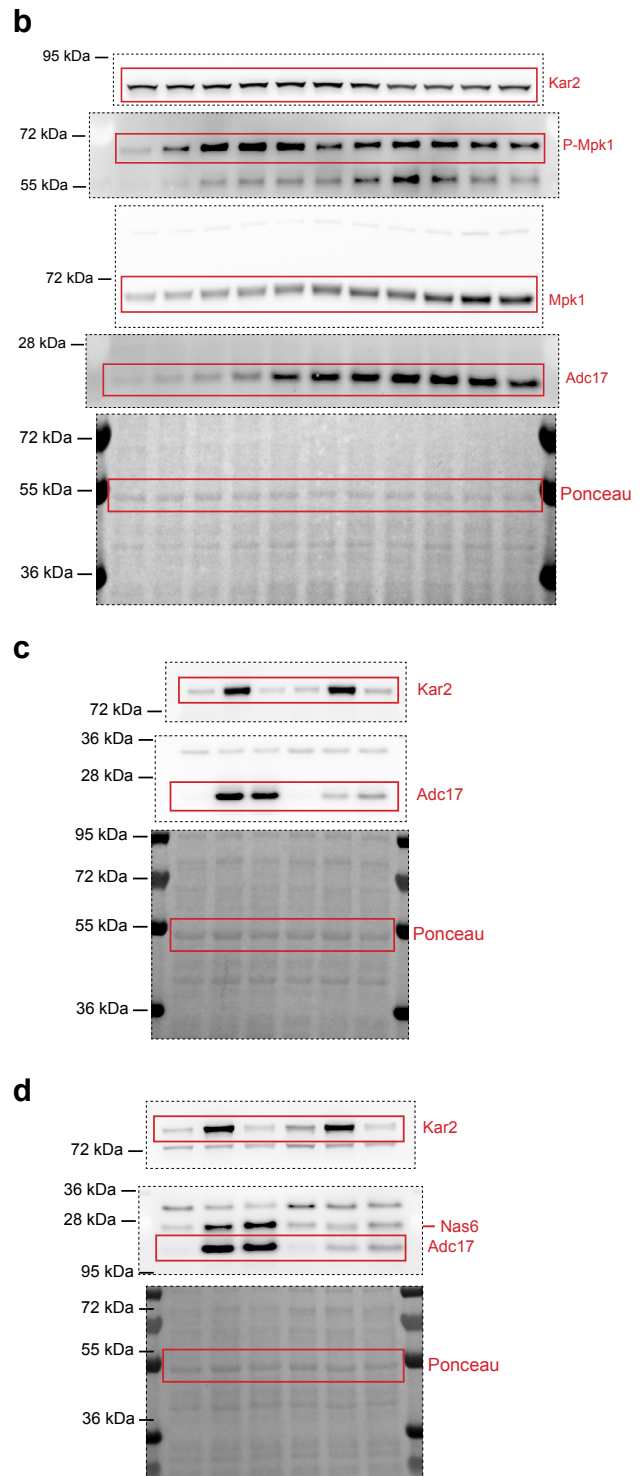

After protein transfer membranes were cut and their fragments were incubated with antibodies against indicated proteins.

### Extended Data Figure 3

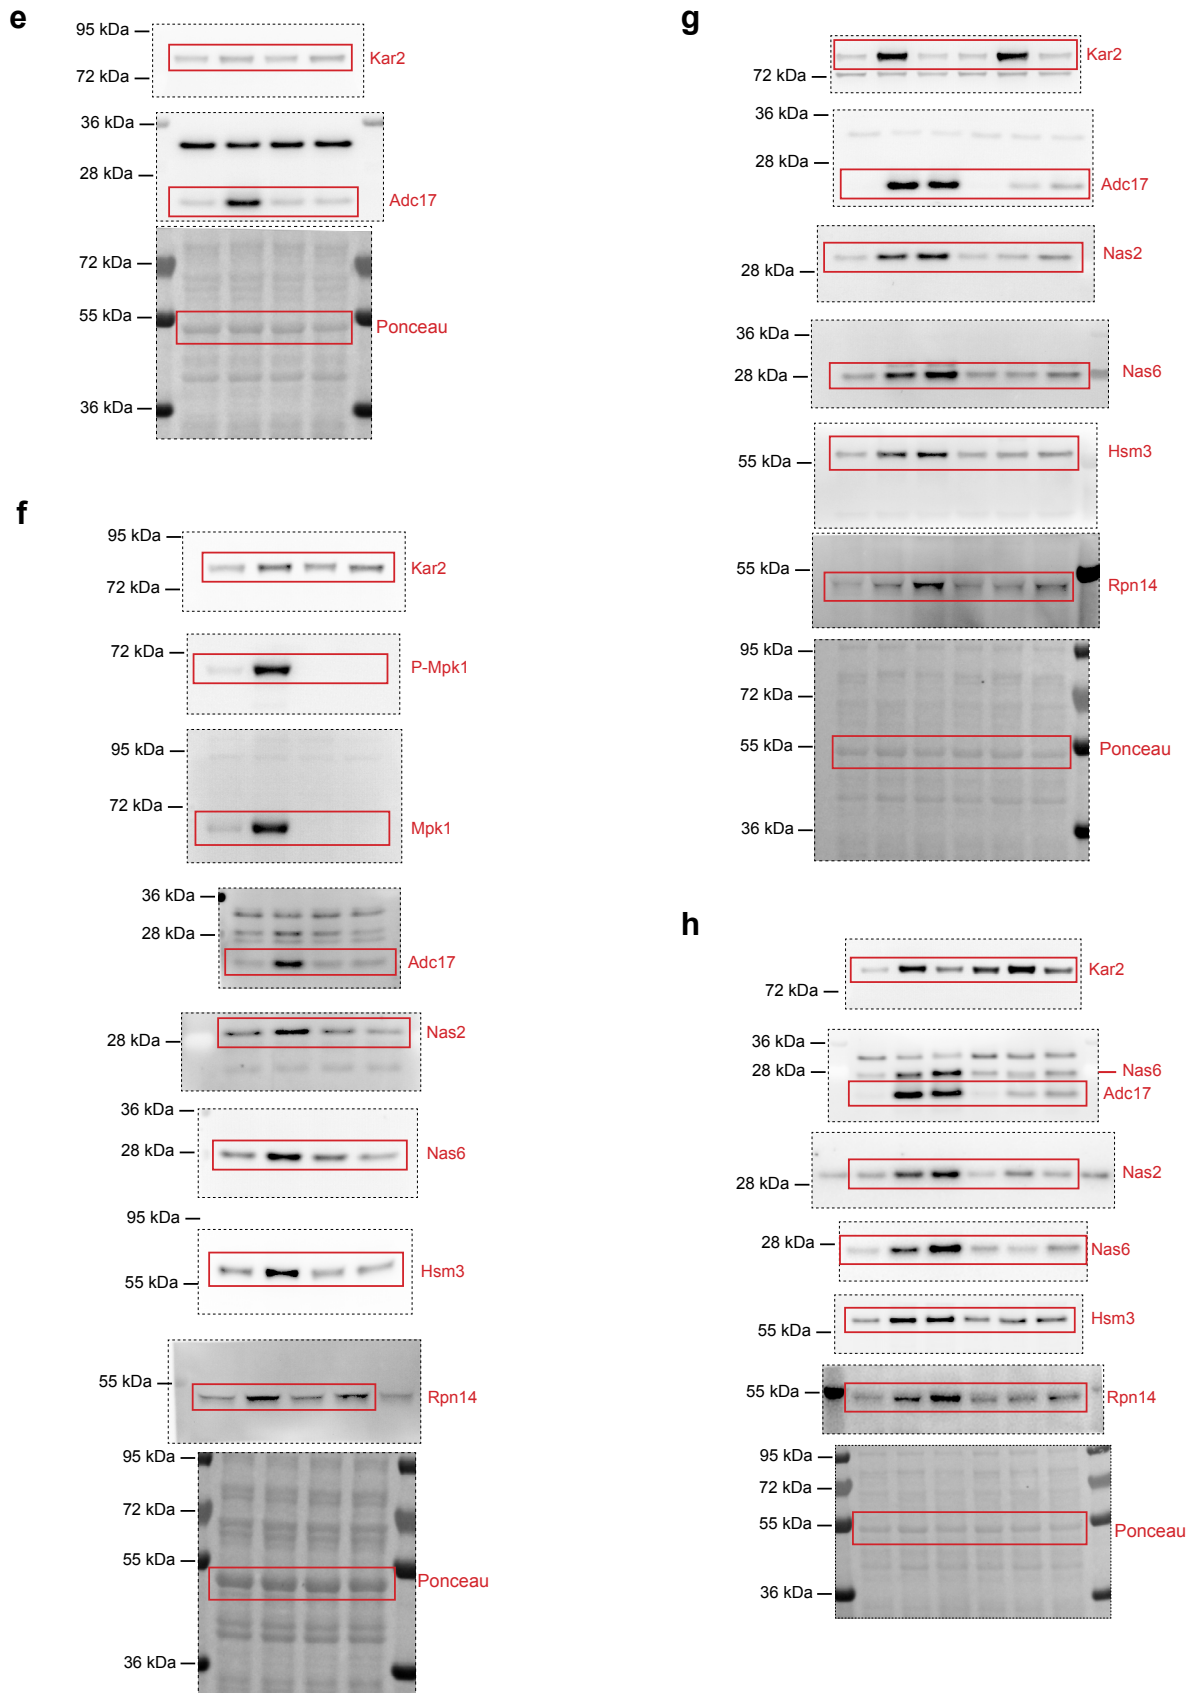

After protein transfer membranes were cut and their fragments were incubated with antibodies against indicated proteins.

## Extended Data Figure 5

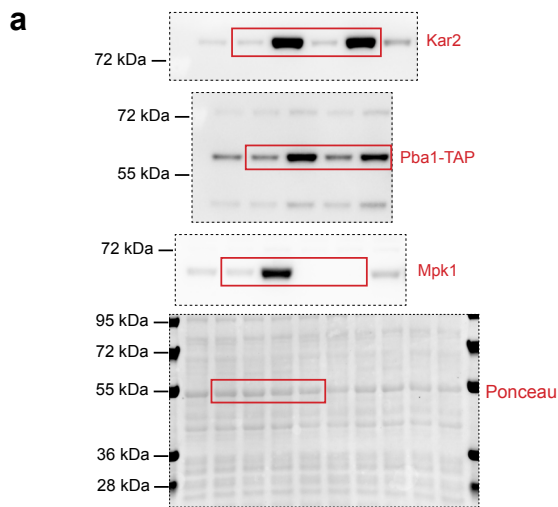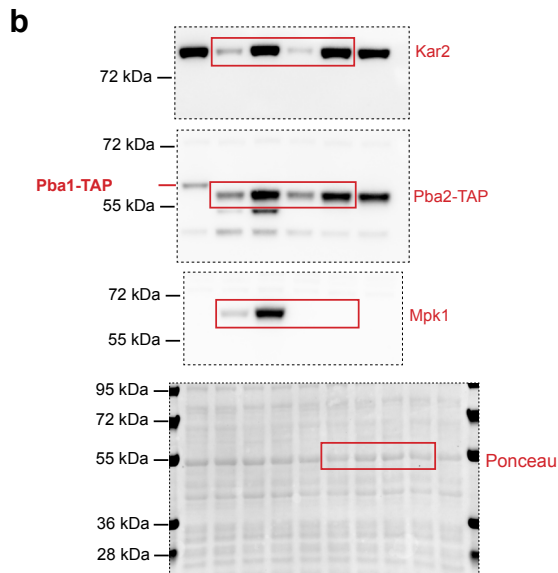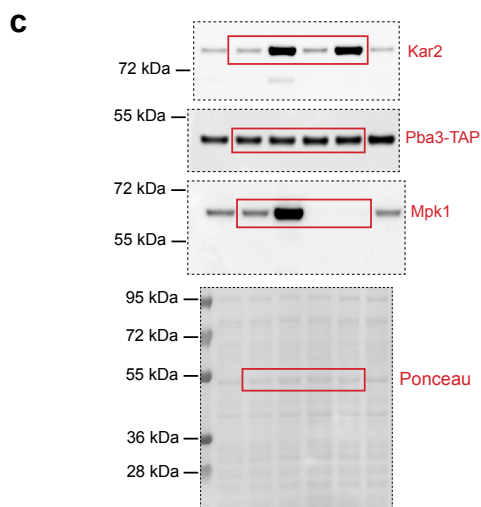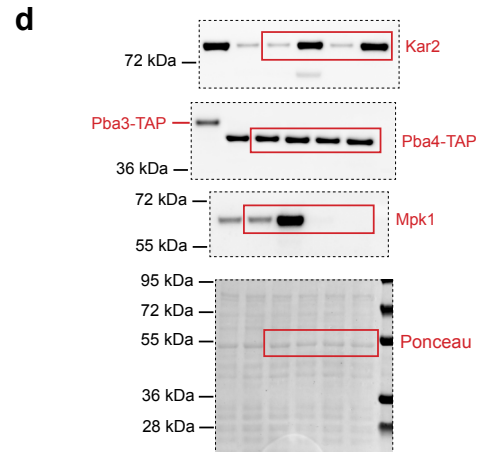

## Extended Data Figure 6

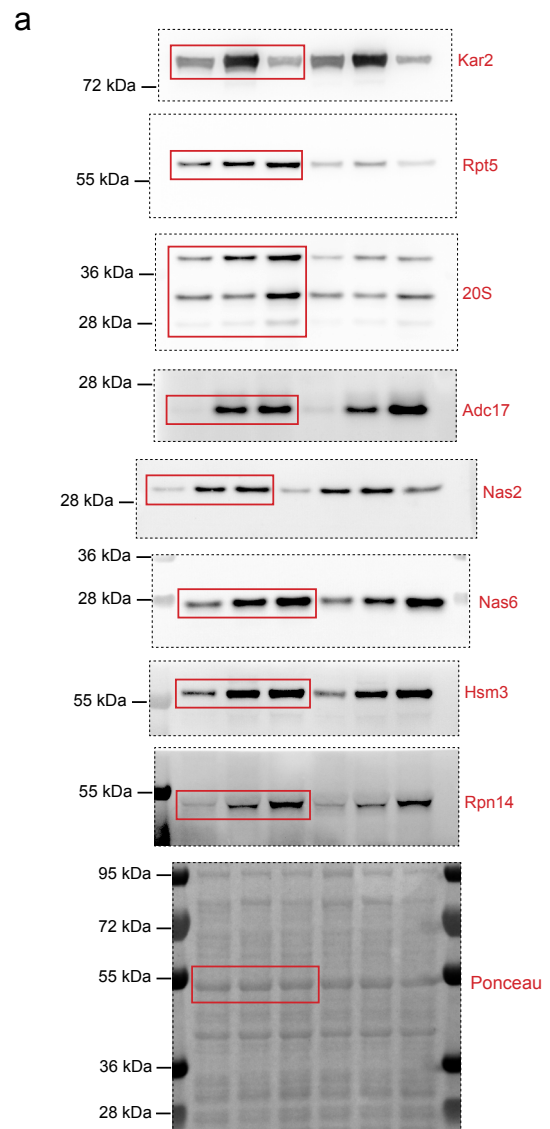

After protein transfer membranes were cut and their fragments were incubated with antibodies against indicated proteins.

## Extended Data Figure 6

**b**

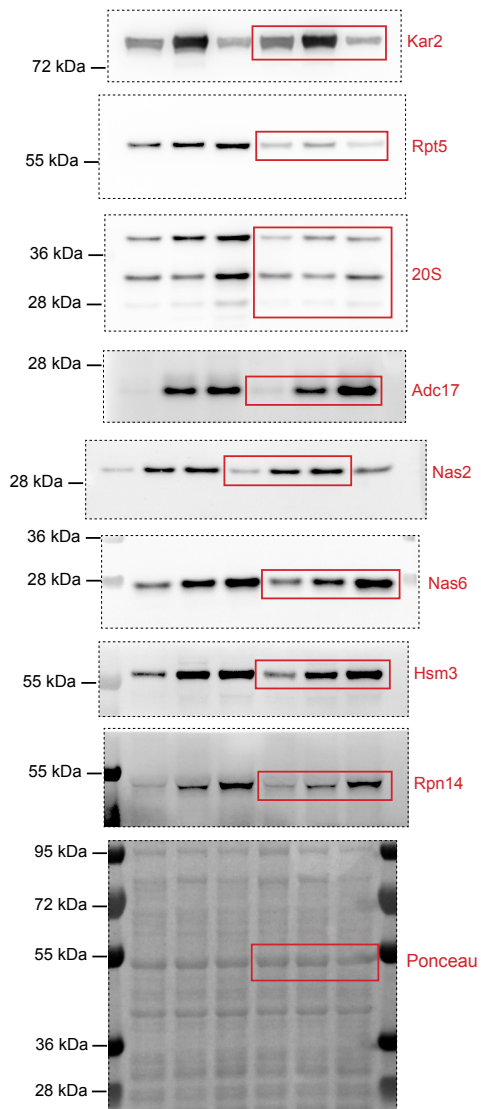

**c**

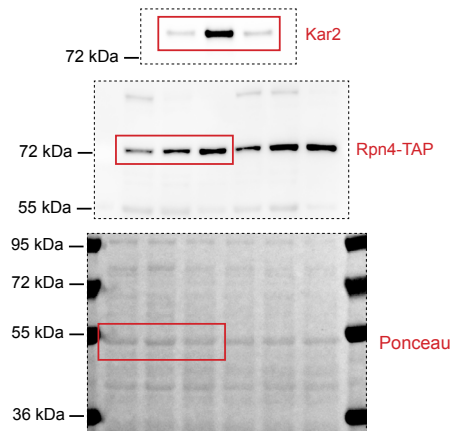

**d**

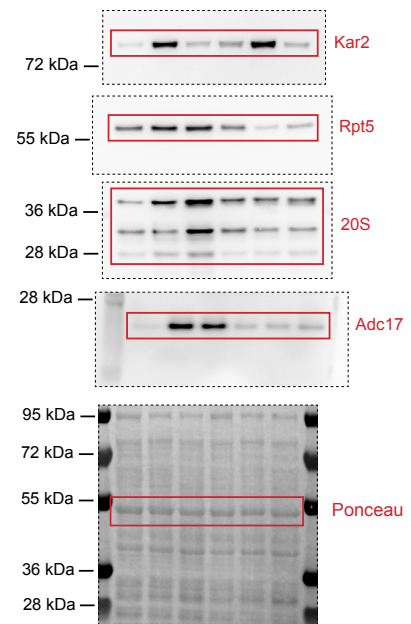

**g**

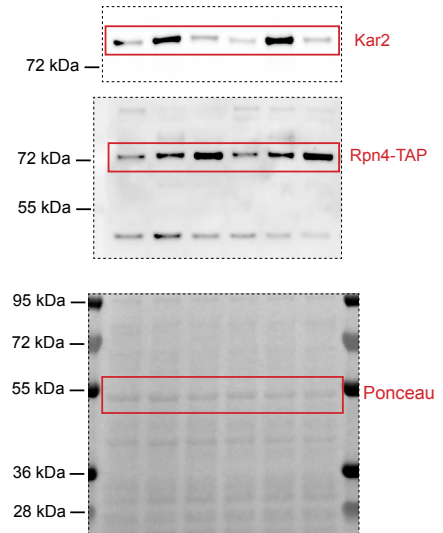

After protein transfer membranes were cut and their fragments were incubated with antibodies against indicated proteins.



## Extended Data Figure 6

**h**

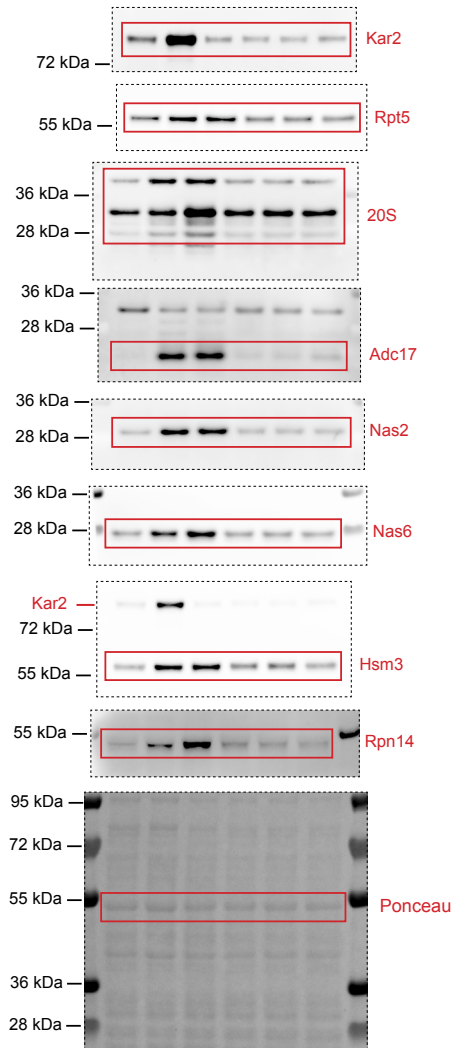

**i (next)**

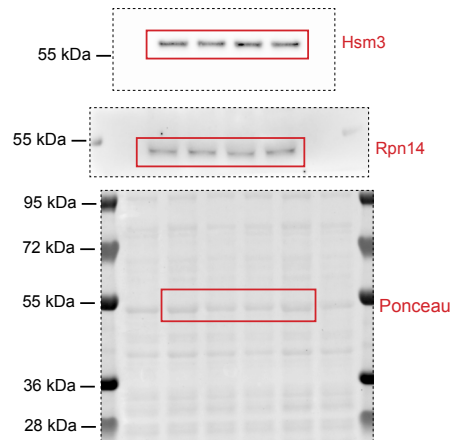

## Extended Data Figure 7

**a**

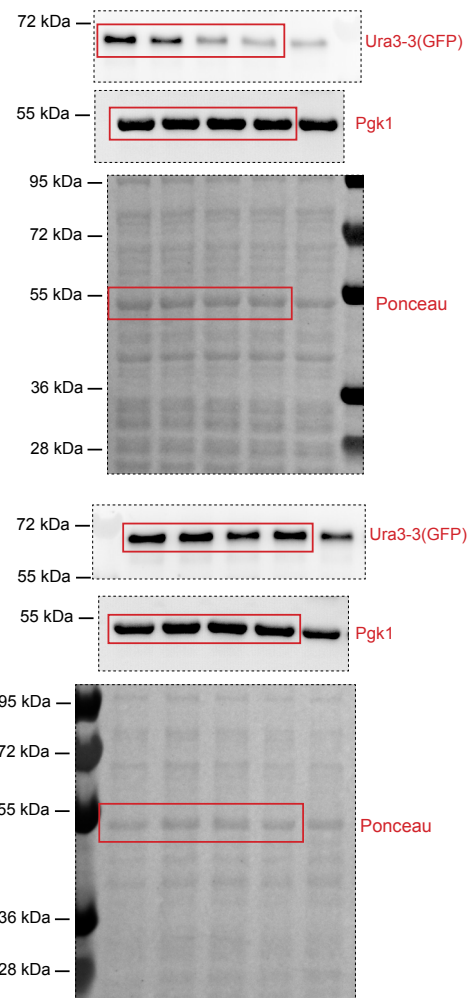

**i**

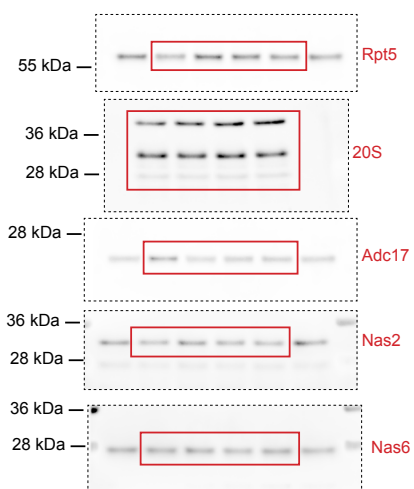

After protein transfer membranes were cut and their fragments were incubated with antibodies against indicated proteins.

## Extended Data Figure 7

**c**

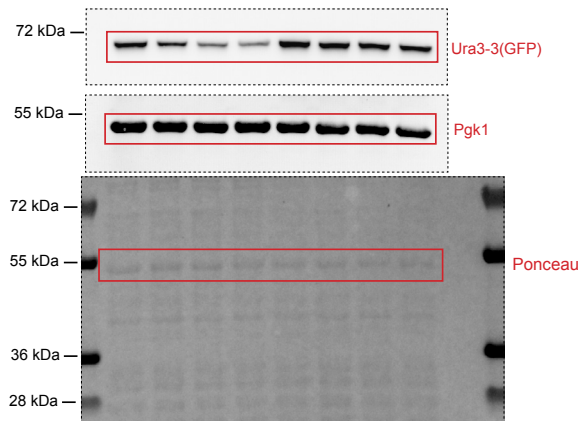

**i**

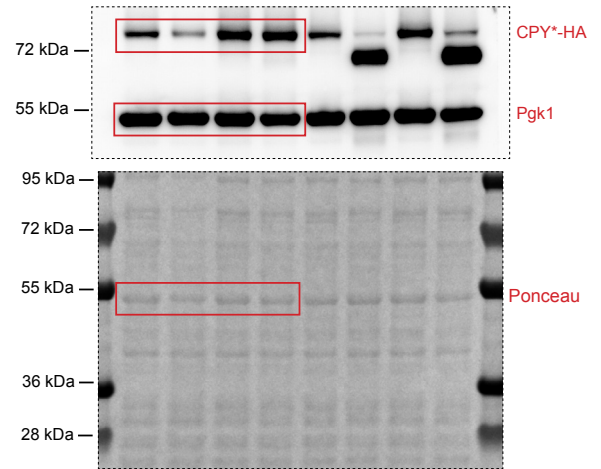

**e**

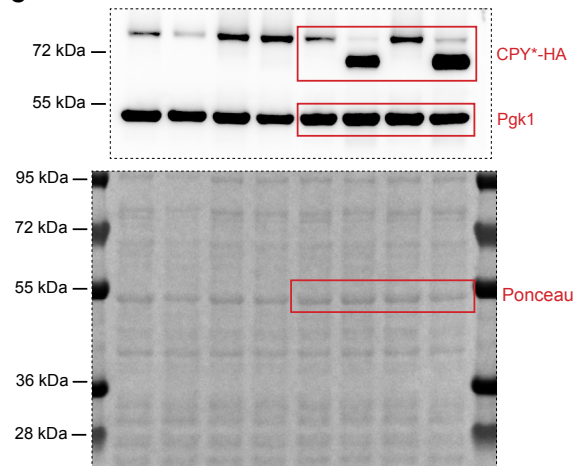

**k**

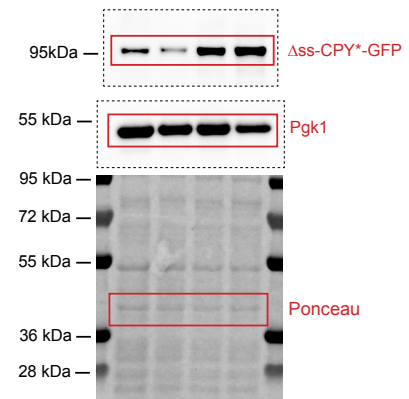

**g**

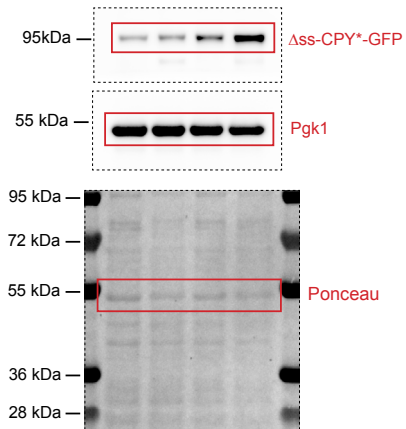

After protein transfer membranes were cut and their fragments were incubated with antibodies against indicated proteins.

## Extended Data Figure 8

**a**

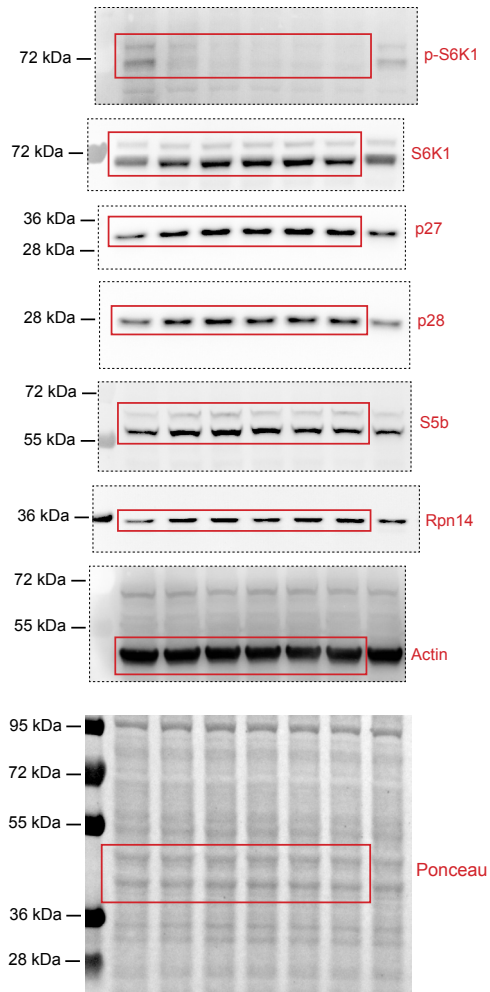

**c**

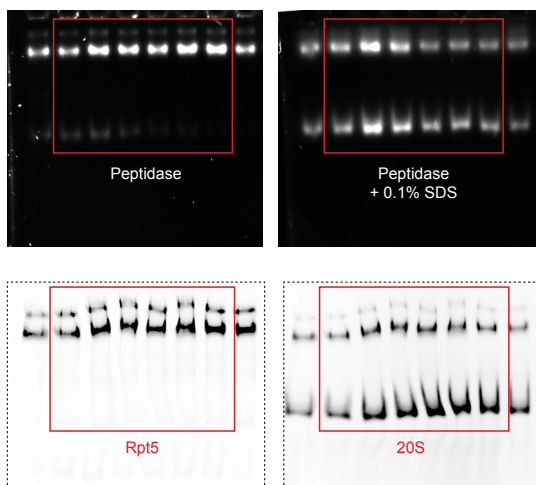

## Extended Data Figure 9

**a**

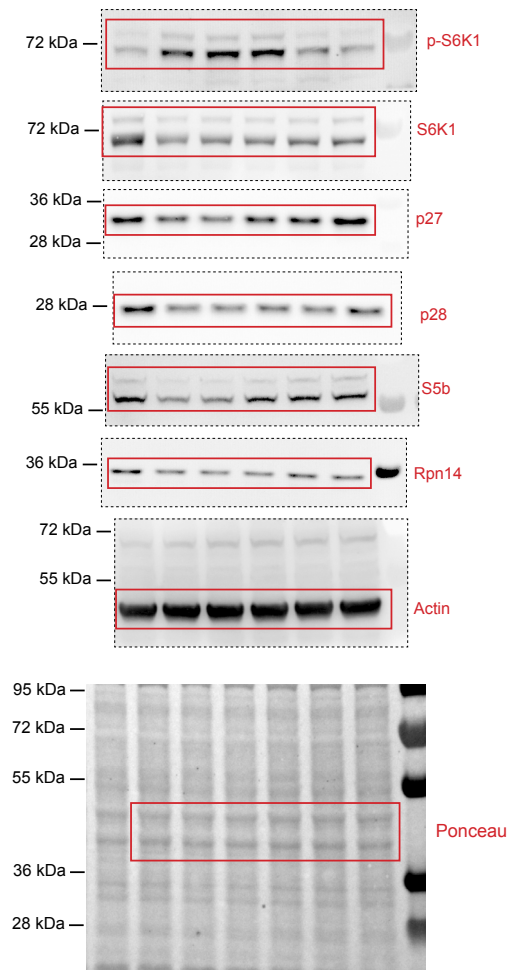

**c**

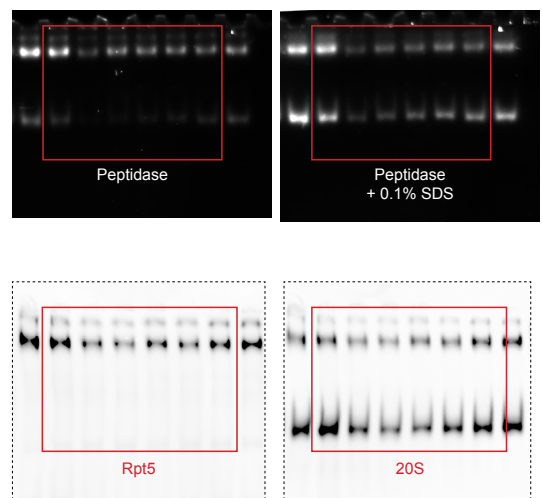

After protein transfer membranes were cut and their fragments were incubated with antibodies against indicated proteins.

## Extended Data Figure 10

**a**

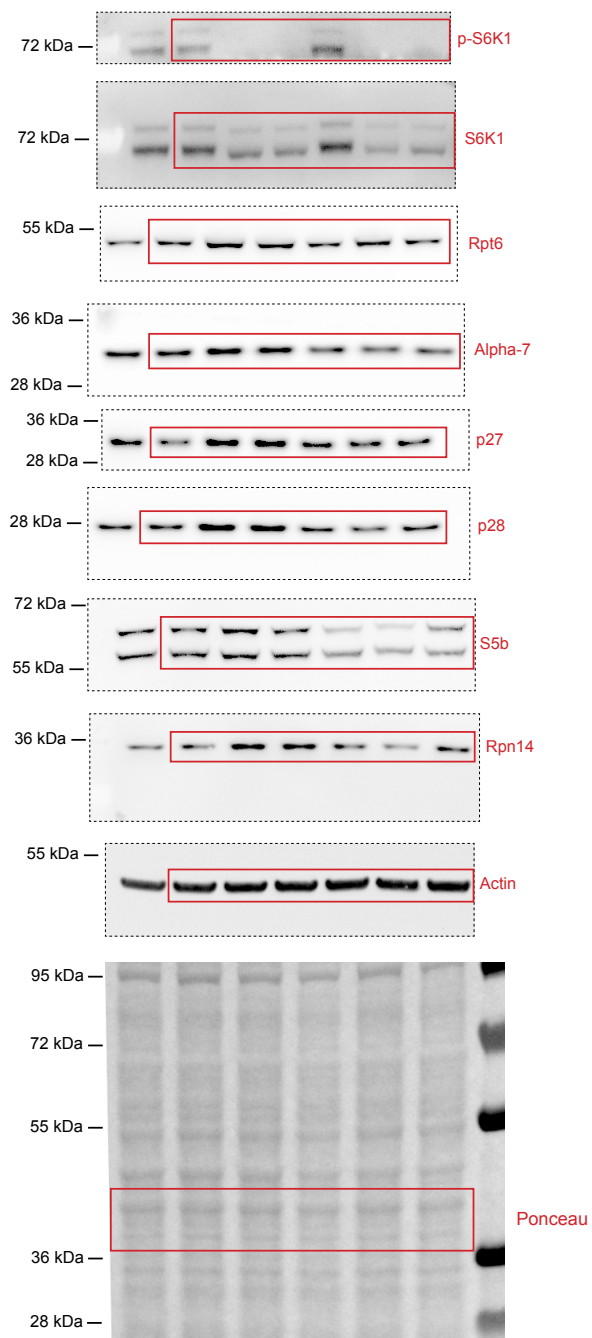

After protein transfer membranes were cut and their fragments were incubated with antibodies against indicated proteins.
