# Supplementary material
Source: PubMed Central journal article supplement (PMC4990136)
Supplement: NIHMS68948-supplement-Supplementary_tables.pdf [file NIHMS68948-supplement-Supplementary_tables.pdf]

**Supplementary Table 1 | List of strains used in this study.**

| <b>Name</b>                 | <b>Genotype</b>                                                    | <b>Source and reference</b>      |
|-----------------------------|--------------------------------------------------------------------|----------------------------------|
| BY4741                      | <i>MATa his3Δ1 leu2Δ0 met15Δ0 ura3Δ0</i>                           | Thermo Scientific Open Biosystem |
| <i>ire1Δ</i> (BY4741)       | <i>MATa his3Δ1 leu2Δ0 met15Δ0 ura3Δ0 ire1::kanMx</i>               | Thermo Scientific Open Biosystem |
| <i>hac1Δ</i> (BY4741)       | <i>MATa his3Δ1 leu2Δ0 met15Δ0 ura3Δ0 hac1::kanMx</i>               | Thermo Scientific Open Biosystem |
| <i>sfp1Δ</i> (BY4741)       | <i>MATa his3Δ1 leu2Δ0 met15Δ0 ura3Δ0 sfp1::kanMx</i>               | Thermo Scientific Open Biosystem |
| <i>DAmP mrs6</i> (BY4741)   | <i>MATa his3Δ1 leu2Δ0 met15Δ0 ura3Δ0 mrs6-3'UTR::kanMx</i>         | GE Dharmacon                     |
| <i>sfp1-GFP</i> (BY4741)    | <i>MATa his3Δ1 leu2Δ0 met15Δ0 ura3Δ0 sfp1-GFP(S65T)-His3MX</i>     | Thermo Fisher Scientific         |
| <i>fus3Δ</i> (BY4741)       | <i>MATa his3Δ1 leu2Δ0 met15Δ0 ura3Δ0 fus3::kanMx</i>               | Thermo Scientific Open Biosystem |
| <i>hog1Δ</i> (BY4741)       | <i>MATa his3Δ1 leu2Δ0 met15Δ0 ura3Δ0 hog1::kanMx</i>               | Thermo Scientific Open Biosystem |
| <i>kss1Δ</i> (BY4741)       | <i>MATa his3Δ1 leu2Δ0 met15Δ0 ura3Δ0 kss1::kanMx</i>               | Thermo Scientific Open Biosystem |
| <i>mpk1Δ</i> (BY4741)       | <i>MATa his3Δ1 leu2Δ0 met15Δ0 ura3Δ0 mpk1::kanMx</i>               | Thermo Scientific Open Biosystem |
| <i>smk1Δ</i> (BY4741)       | <i>MATa his3Δ1 leu2Δ0 met15Δ0 ura3Δ0 smk1::kanMx</i>               | Thermo Scientific Open Biosystem |
| <i>bck1Δ</i> (BY4741)       | <i>MATa his3Δ1 leu2Δ0 met15Δ0 ura3Δ0 bck1::kanMx</i>               | Thermo Scientific Open Biosystem |
| <i>mkk1/2Δ</i> (BY4741)     | <i>MATa his3Δ1 met15Δ0 ura3Δ0 mkk1::leu2 mkk2::kanMx</i>           | This study                       |
| <i>rpn4Δ</i> (BY4741)       | <i>MATa his3Δ1 leu2Δ0 met15Δ0 ura3Δ0 rpn4::kanMx</i>               | Thermo Scientific Open Biosystem |
| <i>rpt4-145</i> (BY4741)    | <i>MATa rpt4-145 his3Δ1 leu2Δ0 met15Δ0 ura3Δ0</i>                  | Zhijian Li <i>et al.</i> , 2011  |
| <i>kog1-1</i> (BY4741)      | <i>MATa kog1-1 his3Δ1 leu2Δ0 met15Δ0 ura3Δ0</i>                    | Zhijian Li <i>et al.</i> , 2011  |
| <i>adc17Δ</i> (BY4741)      | <i>MATa his3Δ1 leu2Δ0 met15Δ0 ura3Δ0 adc17::kanMx</i>              | Thermo Scientific Open Biosystem |
| <i>nas2Δ</i> (BY4741)       | <i>MATa his3Δ1 leu2Δ0 met15Δ0 ura3Δ0 nas2::kanMx</i>               | Thermo Scientific Open Biosystem |
| <i>nas6Δ</i> (BY4741)       | <i>MATa his3Δ1 leu2Δ0 met15Δ0 ura3Δ0 nas6::kanMx</i>               | Thermo Scientific Open Biosystem |
| <i>hsm3Δ</i> (BY4741)       | <i>MATa his3Δ1 leu2Δ0 met15Δ0 ura3Δ0 hsm3::kanMx</i>               | Thermo Scientific Open Biosystem |
| <i>rpn14Δ</i> (BY4741)      | <i>MATa his3Δ1 leu2Δ0 met15Δ0 ura3Δ0 rpn14::kanMx</i>              | Thermo Scientific Open Biosystem |
| <i>adc17Δ nas6 Δ</i>        | <i>MATa leu2Δ0 met15Δ0 ura3Δ0 adc17::his5 nas6::kanMx</i>          | This study                       |
| <i>adc17Δ rpn14 Δ</i>       | <i>MATa leu2Δ0 met15Δ0 ura3Δ0 adc17::his5 rpn14::kanMx</i>         | This study                       |
| <i>rpn14Δ nas6 Δ</i>        | <i>MATa his3Δ1 leu2Δ0 met15Δ0 nas6::ura3 rpn14::kanMx</i>          | This study                       |
| <i>adc17Δ rpn14Δ nas6 Δ</i> | <i>MATa leu2Δ0 met15Δ0 nas6::ura3 adc17::his5 rpn14::kanMx</i>     | This study                       |
| <i>rpn4-TAP</i> (BY4741)    | <i>MATa his3Δ1 leu2Δ0 met15Δ0 ura3Δ0 rpn4::rpn4-TAP-His3MX</i>     | GE Dharmacon                     |
| <i>pba1-TAP</i> (BY4741)    | <i>MATa his3Δ1 leu2Δ0 met15Δ0 ura3Δ0 pba1::pba1-TAP-His3MX</i>     | GE Dharmacon                     |
| <i>pba2-TAP</i> (BY4741)    | <i>MATa his3Δ1 leu2Δ0 met15Δ0 ura3Δ0 pba2::pba2-TAP-His3MX</i>     | GE Dharmacon                     |
| <i>pba3-TAP</i> (BY4741)    | <i>MATa his3Δ1 leu2Δ0 met15Δ0 ura3Δ0 pba3::pba3-TAP-His3MX</i>     | GE Dharmacon                     |
| <i>pba4-TAP</i> (BY4741)    | <i>MATa his3Δ1 leu2Δ0 met15Δ0 ura3Δ0 pba4::pba4-TAP-His3MX</i>     | GE Dharmacon                     |
| <i>rpn4-TAP mpk1Δ</i>       | <i>MATa his3Δ1 leu2Δ0 met15Δ0 mpk1::ura3 rpn4::rpn4-TAP-His3MX</i> | This study                       |
| <i>pba1-TAP mpk1 Δ</i>      | <i>MATa his3Δ1 leu2Δ0 met15Δ0 mpk1::ura3 pba1::pba1-TAP-His3MX</i> | This study                       |
| <i>pba2-TAP mpk1 Δ</i>      | <i>MATa his3Δ1 leu2Δ0 met15Δ0 mpk1::ura3 pba2::pba2-TAP-His3MX</i> | This study                       |
| <i>pba3-TAP mpk1 Δ</i>      | <i>MATa his3Δ1 leu2Δ0 met15Δ0 mpk1::ura3 pba3::pba3-TAP-His3MX</i> | This study                       |
| <i>pba4-TAP mpk1 Δ</i>      | <i>MATa his3Δ1 leu2Δ0 met15Δ0 mpk1::ura3 pba4::pba4-TAP-His3MX</i> | This study                       |

**Supplementary Table 2 | List of plasmids used in this study.**

| <b>Insert</b>        | <b>Vector</b> | <b>Source and reference</b>  |
|----------------------|---------------|------------------------------|
| MPK1                 | p416 GPD      | This study                   |
| HOG1                 | p416 GPD      | This study                   |
| MPK1-K52R            | p416 GPD      | This study                   |
| ADC17                | p416 GPD      | Hanssum <i>et al.</i> , 2014 |
| NAS2                 | p416 GPD      | This study                   |
| NAS6                 | p416 GPD      | This study                   |
| HSN3                 | p416 GPD      | This study                   |
| RPN14                | p416 GPD      | This study                   |
| ADC17                | p415 GPD      | Hanssum <i>et al.</i> , 2014 |
| NAS2                 | p415 GPD      | This study                   |
| NAS6                 | p415 GPD      | Hanssum <i>et al.</i> , 2014 |
| RPN14                | p415 GPD      | Hanssum <i>et al.</i> , 2014 |
| NAS2                 | p413 GPD      | This study                   |
| NAS6                 | p413 GPD      | This study                   |
| HSM3                 | p413 GPD      | This study                   |
| human ERK5           | p416 GPD      | This study                   |
| Ura3-3(GFP)          | pRS414        | Lewis and Pelham, 2009       |
| CPY*-HA              | pRS316        | DH. Wolf                     |
| $\Delta$ ss-CPY*-GFP | pRS316        | DH. Wolf                     |
